# Supplementary material for: The adverse effect of gentamicin on cell metabolism in three cultured mammary cell lines: “Are cell culture data skewed?”
Source: PubMed Central journal article supplement (PMC6443165; doi:10.1371/journal.pone.0214586), 2019-04-01

Table 1. List of primer and probe sequences for RT-qPCR.

| Gene   | Pair of primers (FWD and REV)                  | Probe                       |
|--------|------------------------------------------------|-----------------------------|
| ACTB   | GGATCAGCAAGCAGGAGTATG; AGAAAGGGTGTAACGCAACTAA  | TCGTCCACCGCAAATGCTTCTAGG    |
| HIF1a  | GTCTGCAACATGGAAGGTATTG; GCAGGTCATAGGTGGTTTCT   | ACTGCACAGGCCACATTCACGTAT    |
| HK2    | GCAGAAGGTTGACCAGTATCTC; CCAAGCCCTTTCTCCATCTC   | CACATGCGCCTCTCTGATGAGACC    |
| PFKM   | GCATCCCATTTGTGGTCATTC; GTCACAGGTTGTGCAGATAGT   | AATGTCCCTGGCTCAGACTTCAGC    |
| PKM2   | CTGTGGCTGGACTACAAGAA; CTGCTTACCTGGAGAGAAATA    | AAGTGGGCAGCAAGATCTACGTGG    |
| LDHA   | AGATTCCAGTGTGCCTGTATG; ACCTCTTCCACTGTTCCCTTATC | AGTGGAATGAATGTTGCTGGTGTCTCT |
| SLC2A1 | CTGGGCAAGTCCTTTGAGAT; GTGACACTCACCCACATACA     | AGTACACACCGATGATGAAGCGGC    |
| SLC2A3 | AGGATGCAGGTGTTCAAGAG; GCCCTTCCACCAGAAATAGA     | CGGCGCGGGTGTGGTTAATACTAT    |

Table 2. Lactate production of cell lines cultured in the media without or with 0.05mg/ml gentamicin addition. L-lactate concentration ( $\mu\text{M}$ ) was measured by Cayman glycolysis cell-based assay kit.

| Cell line  | Amount of cells | Media without gentamicin        | Media with 0.05mg/ml gentamicin | p <sup>2</sup> |
|------------|-----------------|---------------------------------|---------------------------------|----------------|
| MCF-12A    | 10,000          | 2.29 $\pm$ 0.41(3) <sup>1</sup> | 3.35 $\pm$ 0.45(3)              | <0.05          |
| MCF-7      | 10,000          | 3.46 $\pm$ 0.45(3)              | 4.25 $\pm$ 0.40(3)              | >0.05          |
| MDA-MB-231 | 10,000          | 3.39 $\pm$ 0.38(3)              | 4.28 $\pm$ 0.54(3)              | >0.05          |

<sup>1</sup> Mean  $\pm$  SD (N)

<sup>2</sup> Unpaired t-test, less than 0.05 as significant; NS: not significant

Table 3. DNA oxidative damage of cell lines cultured in the media without or with 0.05mg/ml gentamicin addition. 8-HOdG concentration ( $\mu\text{M}$ ) in the media was measured by DNA Damage Competitive assay kit.

| Cell line  | Amount of cells | Media without gentamicin     | Media with 0.05mg/ml gentamicin | p <sup>2</sup> |
|------------|-----------------|------------------------------|---------------------------------|----------------|
| MCF-12A    | 10,000          | 248 $\pm$ 65(3) <sup>1</sup> | 375 $\pm$ 41(3)                 | <0.05          |
| MCF-7      | 10,000          | 353 $\pm$ 49(3)              | 445 $\pm$ 0.46(3)               | >0.05          |
| MDA-MB-231 | 10,000          | 351 $\pm$ 48(3)              | 449 $\pm$ 0.45(3)               | >0.05          |

<sup>1</sup> Mean  $\pm$  SD (N)

<sup>2</sup> Unpaired t-test, less than 0.05 as significant; NS: not significant

Fig. 1. Human mammary epithelial MCF-12A cells cultured in the media without and with gentamicin. A: the medium without gentamicin; B: the medium with 0.05 mg/ml gentamicin.

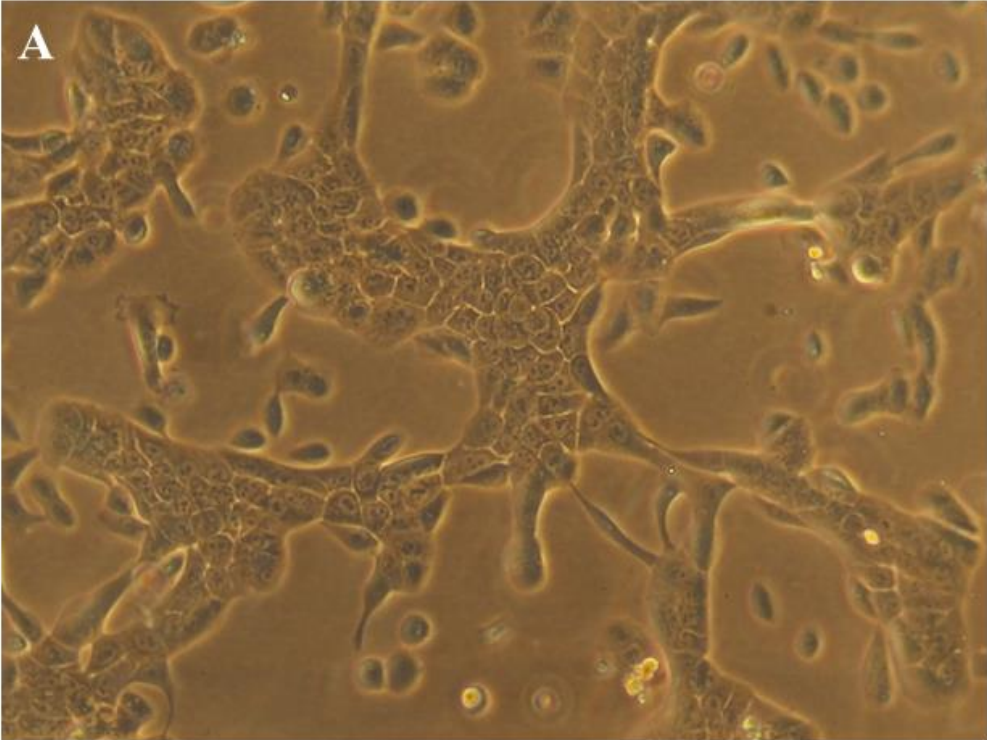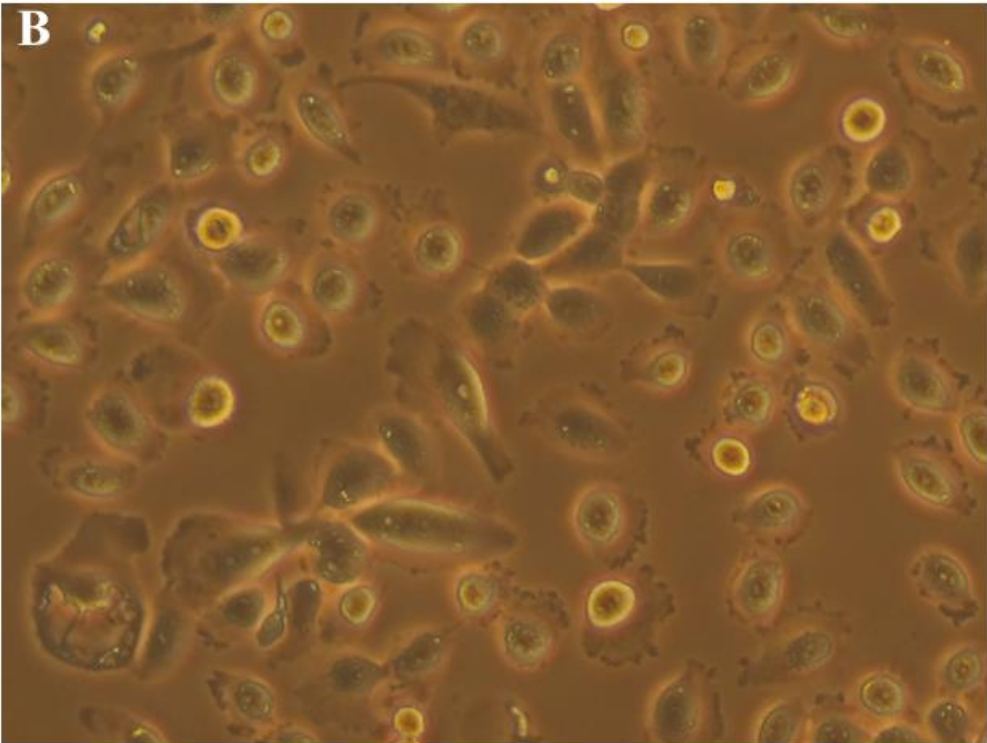

Fig. 2. Gentamicin addition in the media inhibited mitochondrial membrane potential gradient in MCF-12A, MCF-7 and MDA-MB-231 cells. A,B: MCF-12A; C,D: MCF-7; E,F: MDA-MB-231. A, C, E: the media without gentamicin; B,D,F: the media with 0.05mg/ml of gentamicin. (The details seen in the Materials and Methods)

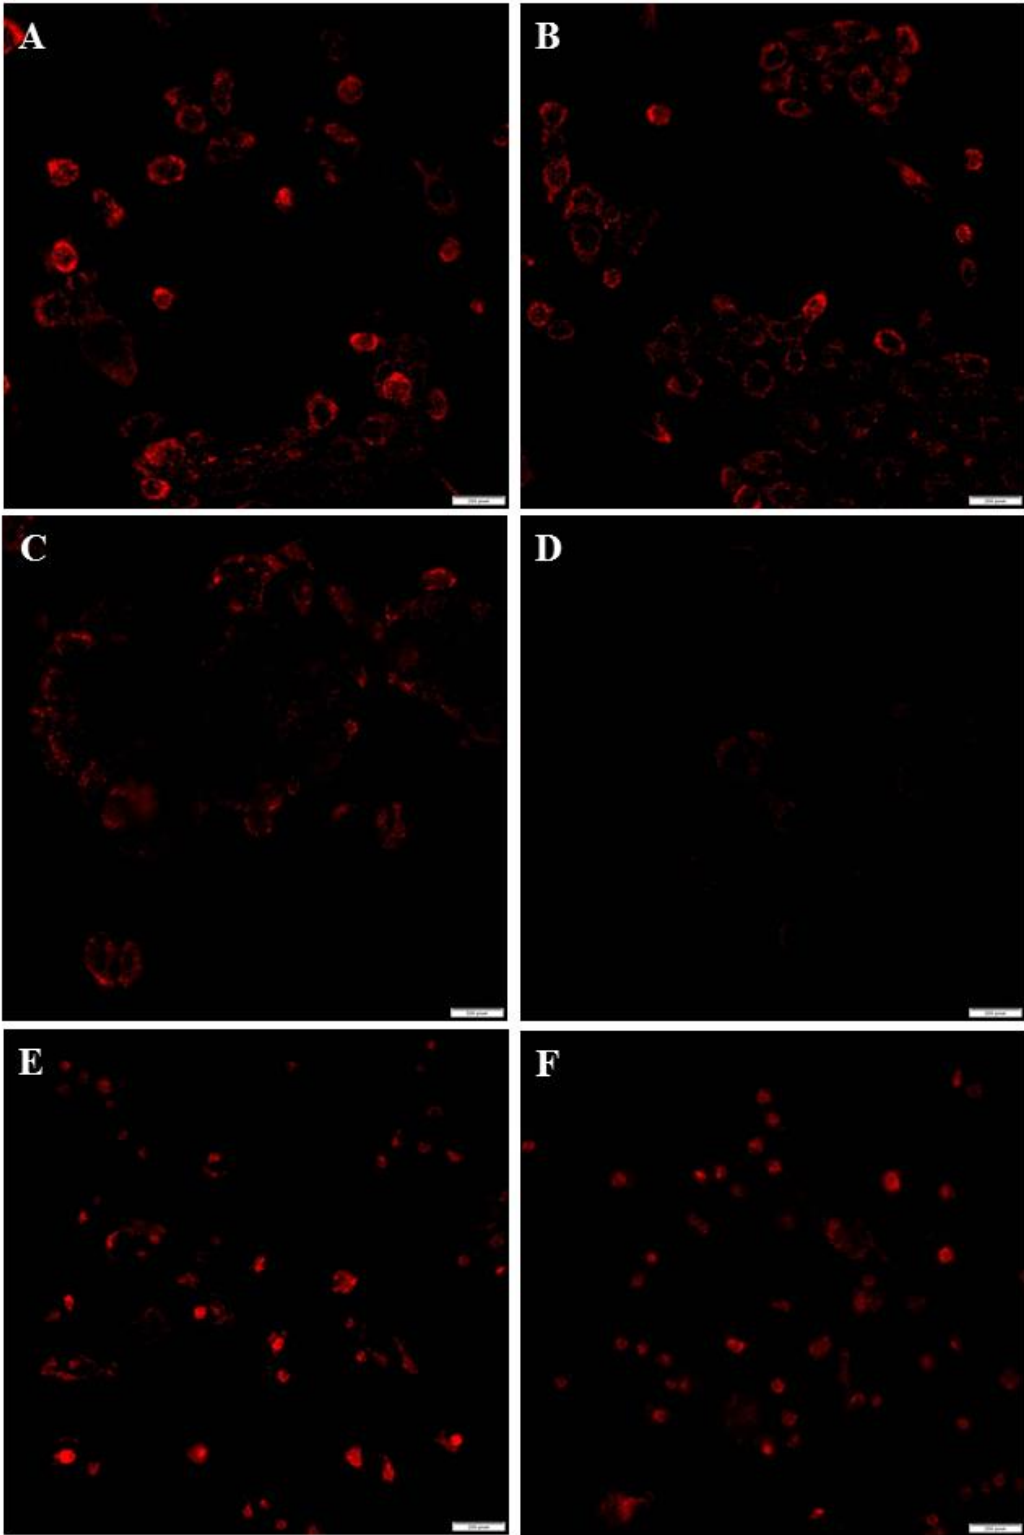

Fig. 3. Gene expression of HIF1a, glycolytic enzymes and glucose transporters in MCF-12A, MCF-7 and MDA-MB-231 cultured in the media without and with 0.05mg/ml gentamicin addition. mRNA was measured by real time PCR. Gene expression was calculated as the ratio of mRNA of the cells cultured in the media with gentamicin to that of the cells in the media without gentamicin. A: MCF-12A; B: MCF-7; C: MDA-MB-231.

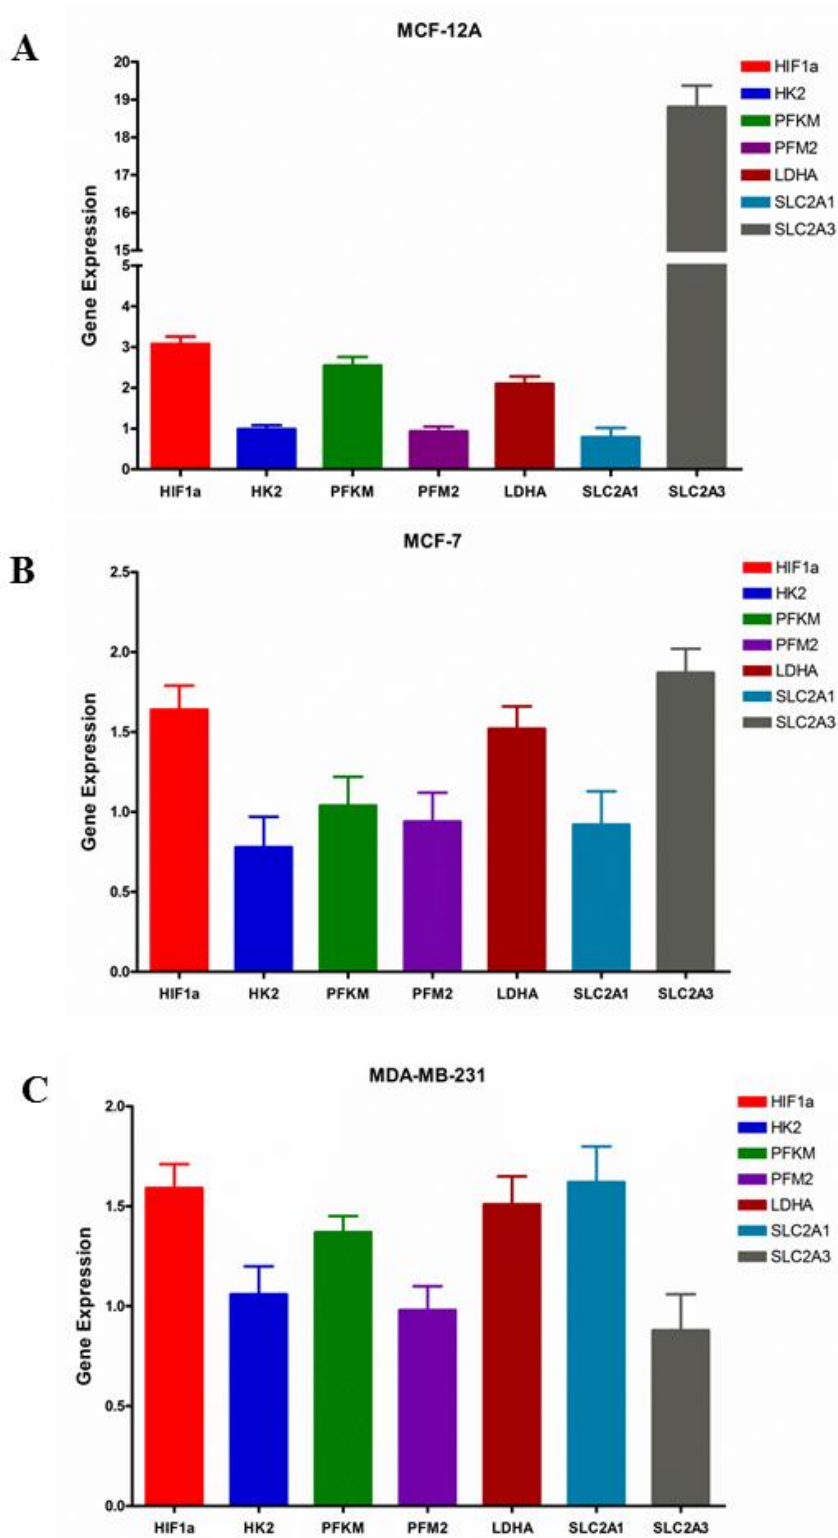

Gene expression data for Fig.3:

| Cell lines | HIF1a*       | HK2          | PFKM         | PFM2         | LDHA         | SLC2A1       | SLC2A3        |
|------------|--------------|--------------|--------------|--------------|--------------|--------------|---------------|
| MCF-12A    | 3.08±0.18(3) | 0.99±0.09(3) | 2.55±0.21(3) | 0.93±0.12(3) | 2.10±0.18(3) | 0.79±0.23(3) | 18.81±0.56(3) |
| MCF-7      | 1.64±0.15(3) | 0.78±0.19(3) | 1.04±0.18(3) | 0.94±0.18(3) | 1.52±0.14(3) | 0.92±0.21(3) | 1.87±0.15(3)  |
| MDAMB231   | 1.59±0.12(3) | 1.06±0.14(3) | 1.37±0.08(3) | 0.98±0.12(3) | 1.51±0.14(3) | 1.62±0.18(3) | 0.88±0.18(3)  |

\*Mean±SD (N)

Fig. 4. Gentamicin in culture media increases mitochondrial superoxide of MCF-12A, MCF-7 and MDA-MB-231 cells. A, C, E: the media without gentamicin; B, D, F: the media with 0.05mg/ml gentamicin. A, B: MCF-12A; C, D: MCF-7; E, F: MDA-MB-231.

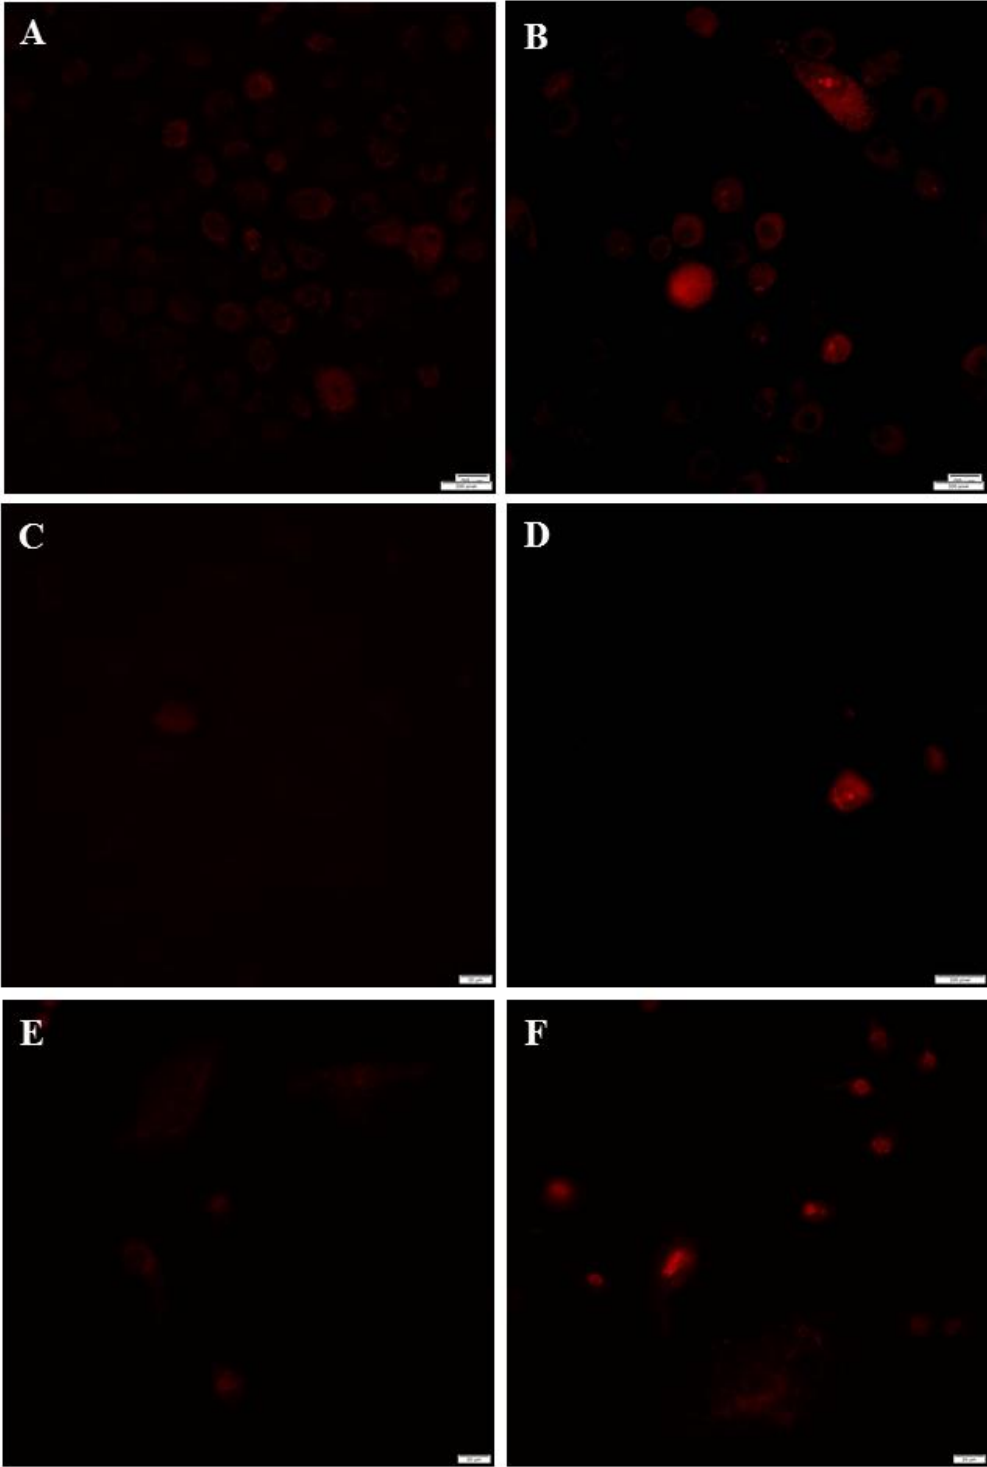

Supplement: pone.0214586.s001.pdf [file pone.0214586.s001.pdf]
